# Supplementary material for: Network structure and fluctuation data improve inference of metabolic interaction strengths with the inverse Jacobian
Source: PubMed Central journal article supplement (PMC11585569; doi:10.1038/s41540-024-00457-y), 2024-11-23
Supplement: 41540_2024_457_MOESM1_ESM.pdf [file 41540_2024_457_MOESM1_ESM.pdf]

## Supplementary Information:

### Network structure and fluctuation data improve inference of metabolic interaction strengths with the inverse Jacobian

#### Contents

|                           |       |
|---------------------------|-------|
| ● Supplementary Note 1    | 2     |
| ● Supplementary Figure 1  | 3     |
| ● Supplementary Figure 2  | 4-5   |
| ● Supplementary Figure 3  | 6     |
| ● Supplementary Figure 4  | 7     |
| ● Supplementary Figure 5  | 8     |
| ● Supplementary Figure 6  | 9     |
| ● Supplementary Figure 7  | 10-11 |
| ● Supplementary Figure 8  | 12-13 |
| ● Supplementary Figure 9  | 14    |
| ● Supplementary Figure 10 | 15    |
| ● Supplementary Figure 11 | 16-17 |
| ● Supplementary Figure 12 | 18    |

# Supplementary Note 1

## Evaluation literature models

To evaluate our algorithm and the potential effect of non-diagonal fluctuations on the differential Jacobian, we consider the four literature models that have also been used in our previous study [1]. We describe how to generate the two conditional Jacobians as following:

1, A model of carbohydrate energy metabolism [2]: One condition is obtained from the nominal parameter values; for the other condition we increased the reaction rate parameter in R2,  $\text{Pyrute} + \text{NADHc} \rightarrow \text{Lactose} + \text{NADc}$ , five-fold.

2, AMPK-mTOR pathway model [3]: The paper describes a wild type and an mTOR knockout model based on time-series experimental data; these two variants are used to define the differential Jacobian.

3, Hepatic glucose metabolism model [4]. The first condition is from nominal parameters. We applied a two-fold parameter change for the reaction rate of the second reaction R2 for the second condition.

4, Large-scale blood cell metabolism model [5]. We introduced a five-fold increase to several components of the Jacobian matrix directly.

These Jacobian matrixes are available in Supplementary data 1.

## References

1. Li, J., S. Waldherr, and W. Weckwerth, *COVRECON: Automated Integration of Genome- and Metabolome-Scale Network Reconstruction and Data-driven Inverse Modeling of Metabolic Interaction Networks*. Bioinformatics, 2023.
2. Nazaret, C. and J.-P. Mazat, *An old paper revisited: "A mathematical model of carbohydrate energy metabolism. Interaction between glycolysis, the Krebs cycle and the H-transporting shuttles at varying ATPases load"* by VV Dynnik, R. Heinrich and EE Sel'kov. *Journal of theoretical biology*, 2008. **252**(3): p. 520-529.
3. Dalle Pezze, P., et al., *A systems study reveals concurrent activation of AMPK and mTOR by amino acids*. *Nature communications*, 2016. **7**(1): p. 1-19.
4. Bulik, S., H.-G. Holzhütter, and N. Berndt, *The relative importance of kinetic mechanisms and variable enzyme abundances for the regulation of hepatic glucose metabolism—insights from mathematical modeling*. *BMC biology*, 2016. **14**(1): p. 1-22.
5. Holzhütter, H.G., *The principle of flux minimization and its application to estimate stationary fluxes in metabolic networks*. *European journal of biochemistry*, 2004. **271**(14): p. 2905-2922.

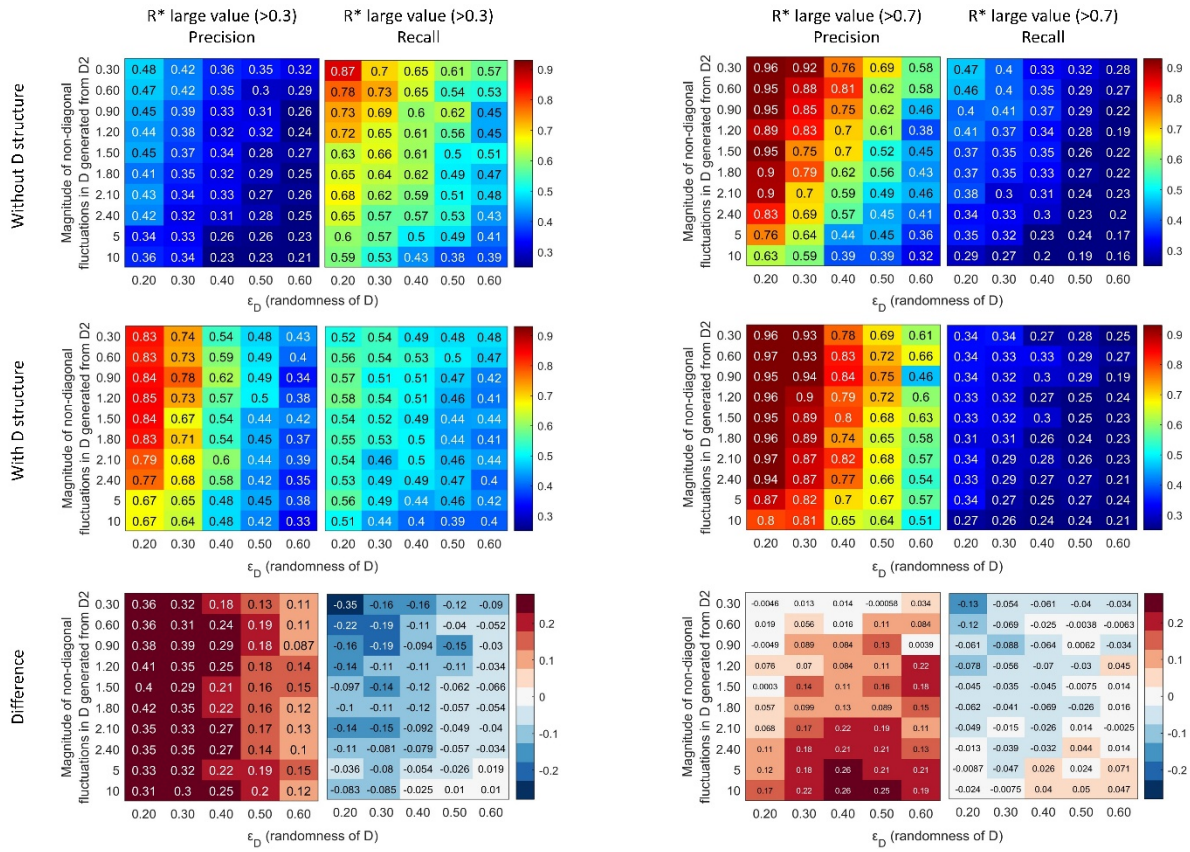

**Supplementary Figure 1. Precision and Recall of the large values in  $R^*$  based on different thresholds (left: 0.3, right: 0.7). Color code refers to Figure 4A.**

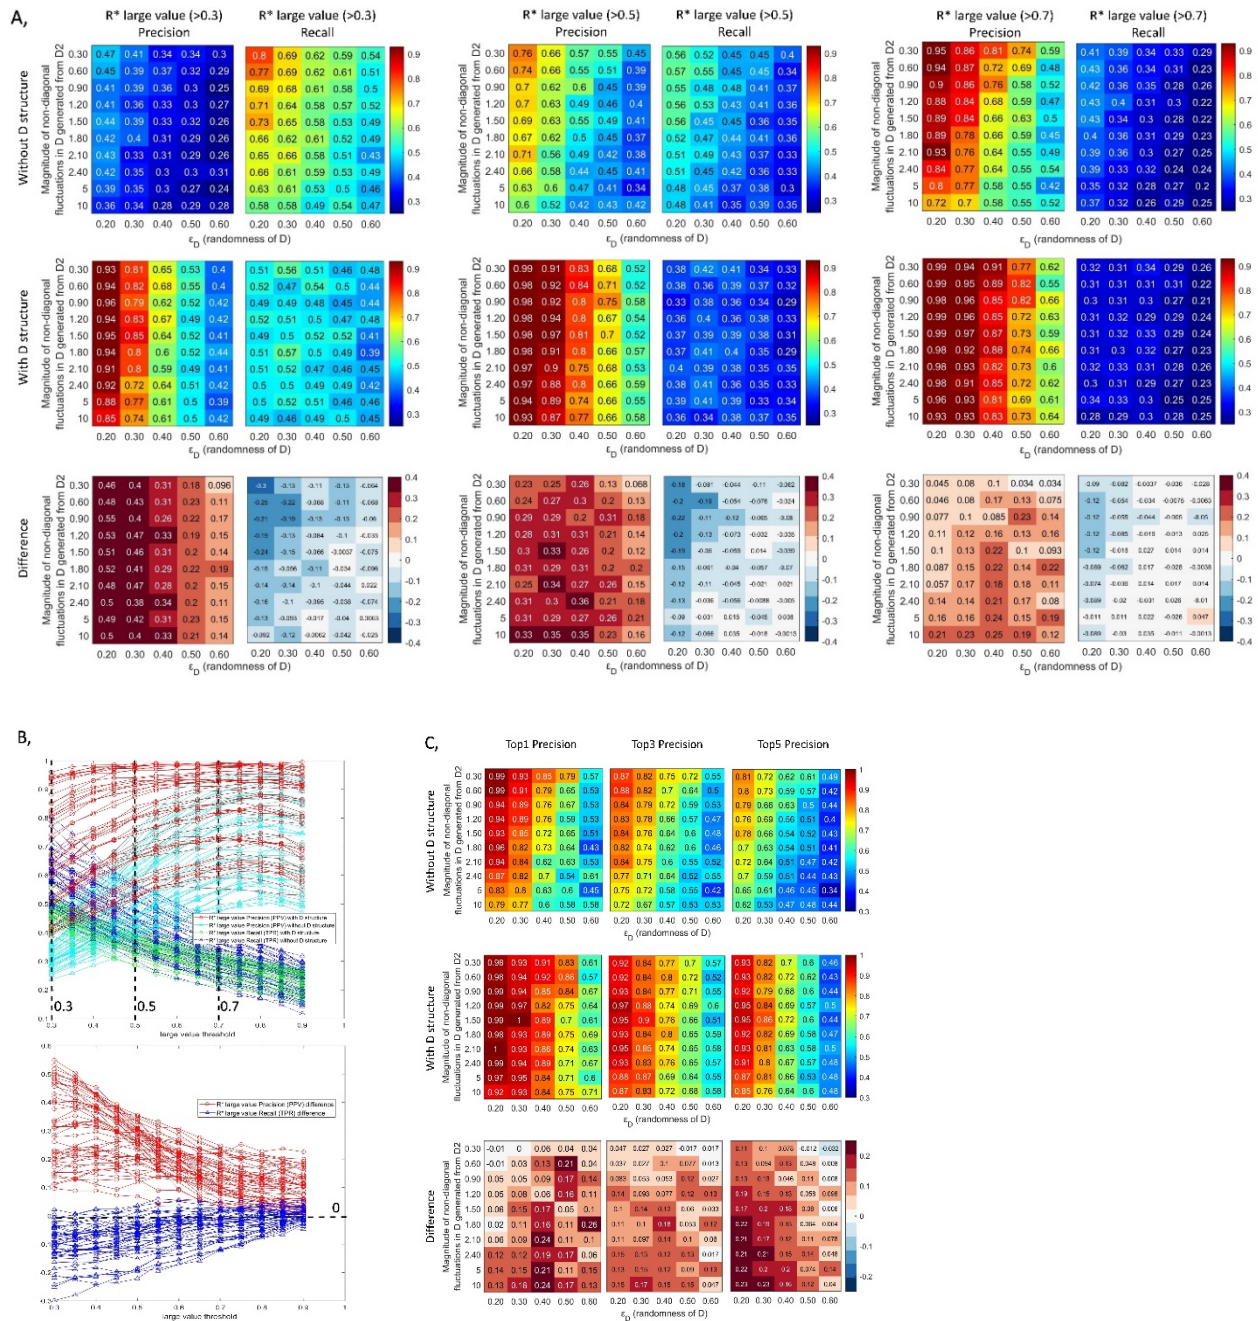

**Supplementary Figure 2. Inverse differential Jacobian algorithm with/without D structure evaluation using various randomness of  $\varepsilon_D$  and the magnitude of off-diagonal fluctuations.** The evaluation is conducted using the first model in method section with 200 repeats and 6 random enzyme fluctuations applied. A, Precision and Recall of the large values (above 0.5) in  $R^*$  over 200 repeats with/without D structure information; B, the line plots of Precision and Recall of the large values in  $R^*$  with/without D structure information based on different large value thresholds (0.3-0.9), where the snapshots of value 0.3,



0.5 and 0.7 refer to A; C, the accuracy of the top 1, top 3 and top 5 large values in  $\mathbf{R}^*$  over 200 repeats with/without D structure information.

Real differential  
Jacobian matrix  $DJ$

All reactions perturbed with 0.3  
times magnitude compared with D1  
magnitude

a,

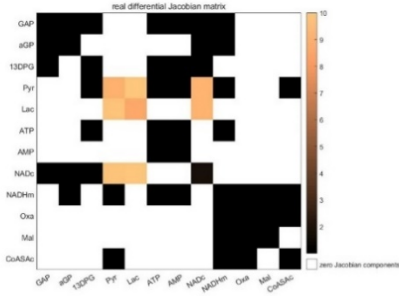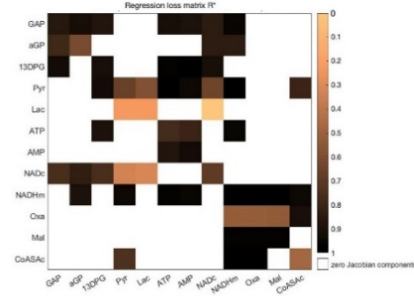

b,

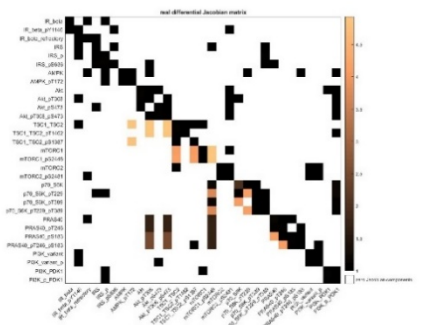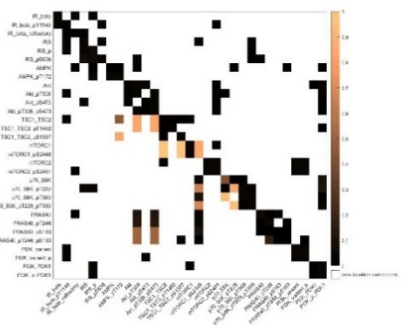

c,

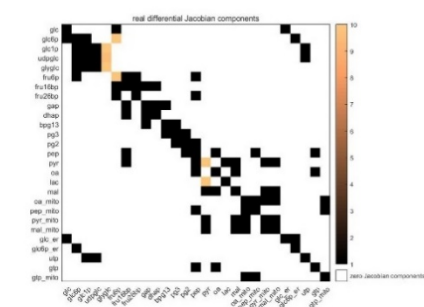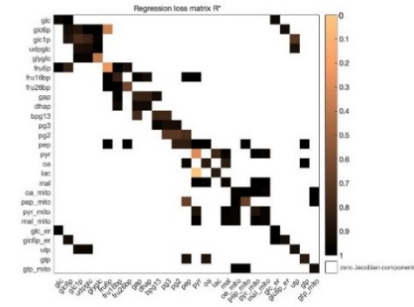

d,

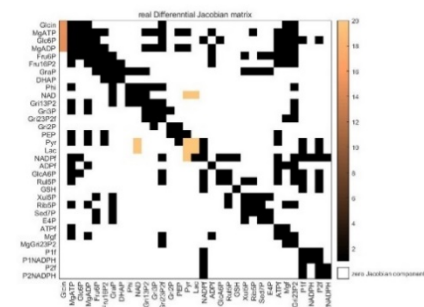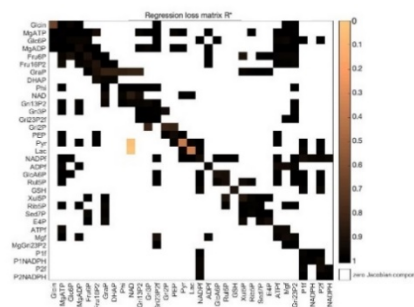

Supplementary Figure 3. The regression loss Jacobian algorithm evaluation assuming a diagonal fluctuation matrix  $D$  with  $\varepsilon_D = 0.4$ . For each test, all reactions are perturbed using a 0.3 magnitude fluctuation compared the metabolites fluctuation.

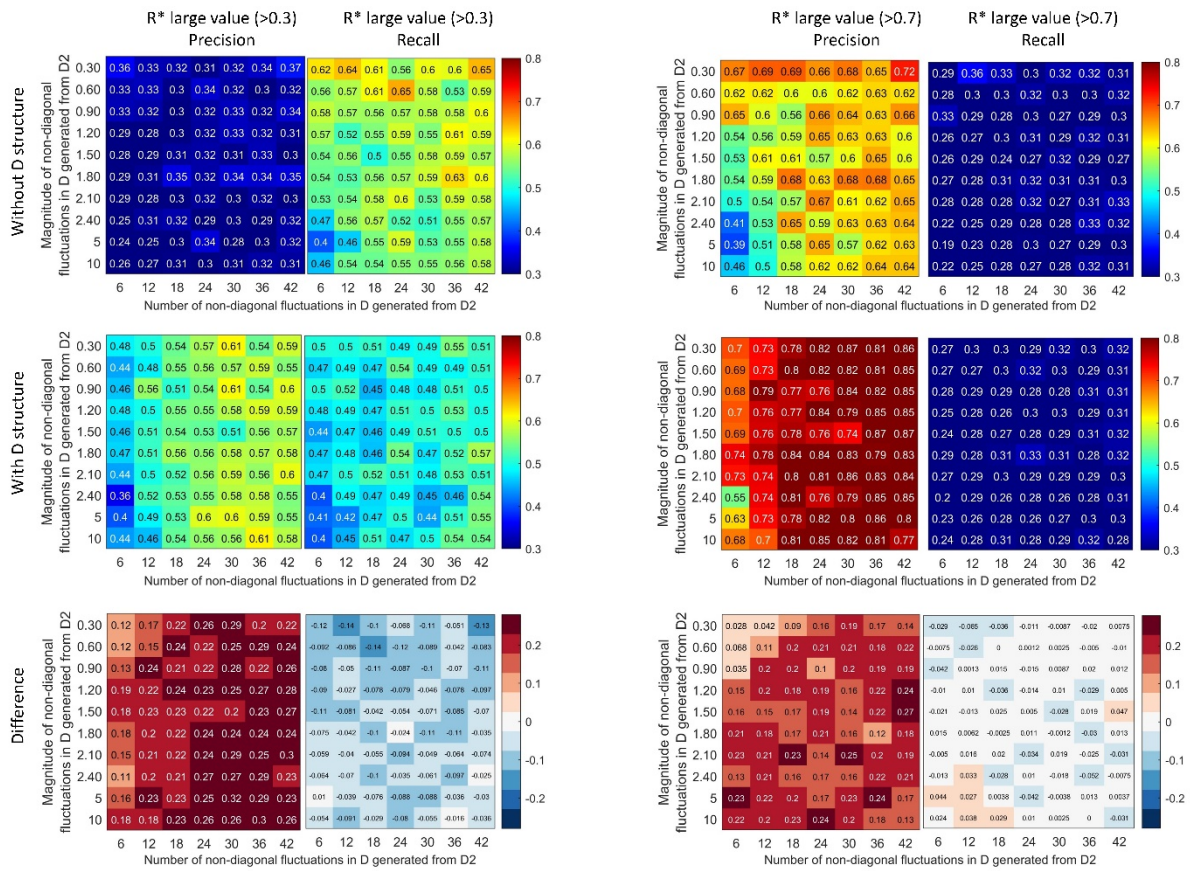

**Supplementary Figure 4. Precision and Recall of the large values in  $R^*$  based on different thresholds (left: 0.3, right: 0.7). Color code refers to Figure 5A.**

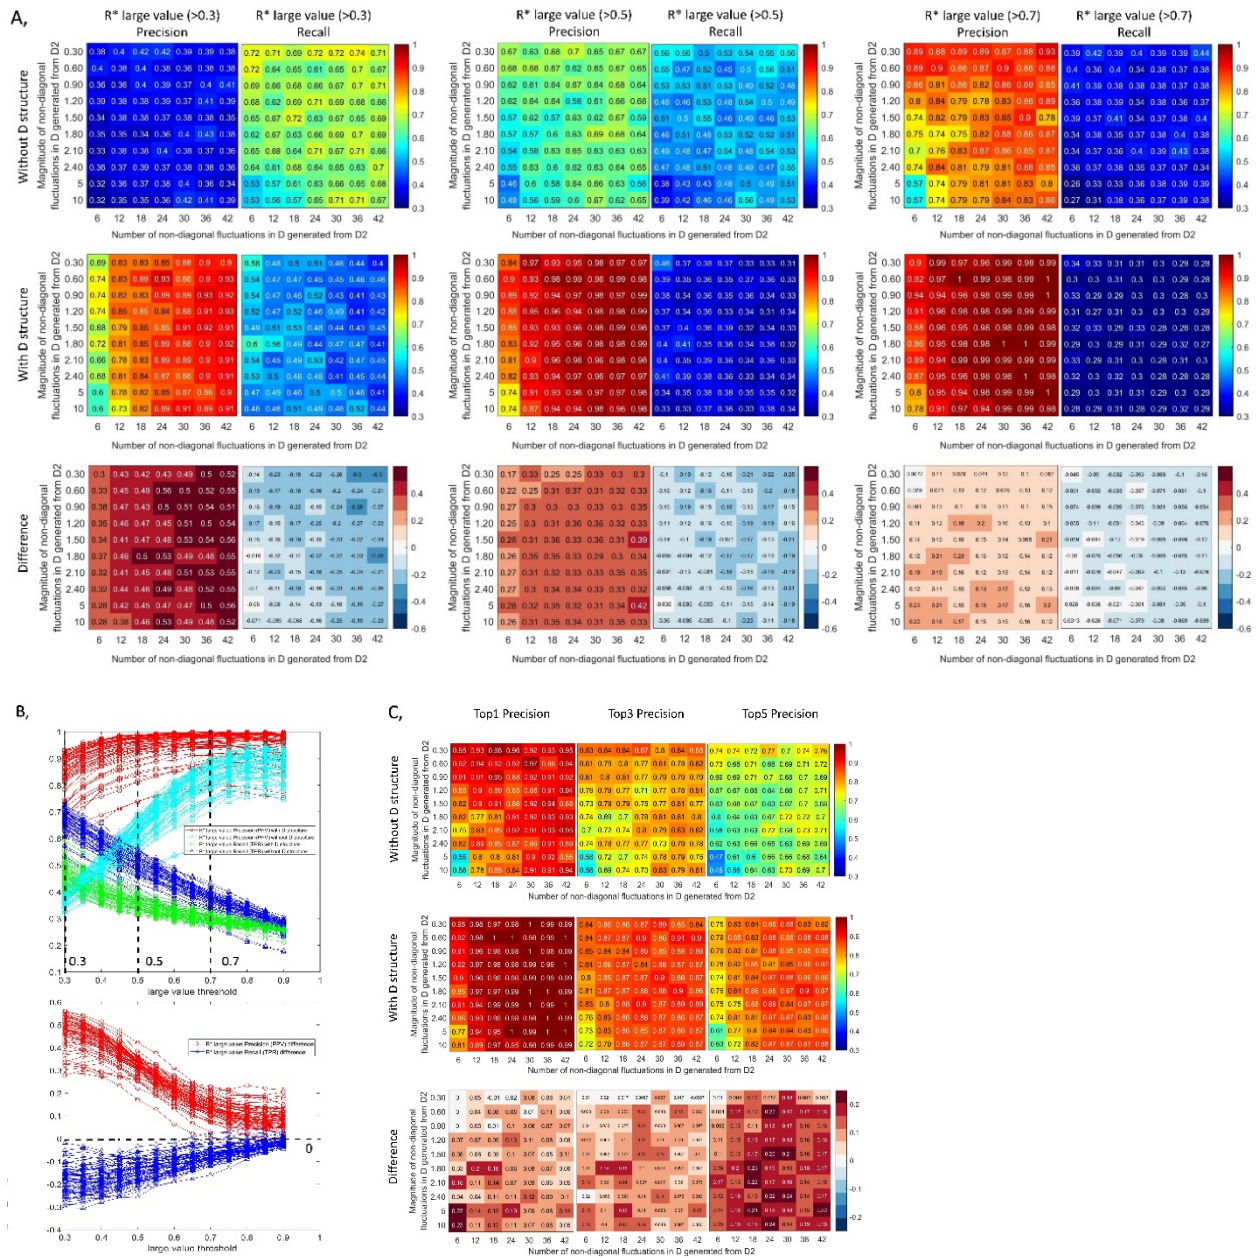

**Supplementary Figure 5. Inverse differential Jacobian algorithm with/without D structure evaluation using various number and magnitude of off-diagonal fluctuations.** The evaluation is conducted using the first model in method section with 200 repeats and  $\epsilon_D = 0.2$ . A, Precision and Recall of the large values (above 0.5) in  $R^*$  over 200 repeats with/without D structure information; B, the line plots of Precision and Recall of the large values in  $R^*$  with/without D structure information based on different large value thresholds (0.3-0.9), where the snapshot of value 0.5 refers to A; C, the accuracy for the top 1, top 3 and top 5 large values in  $R^*$  over 200 repeats with/without D structure information.



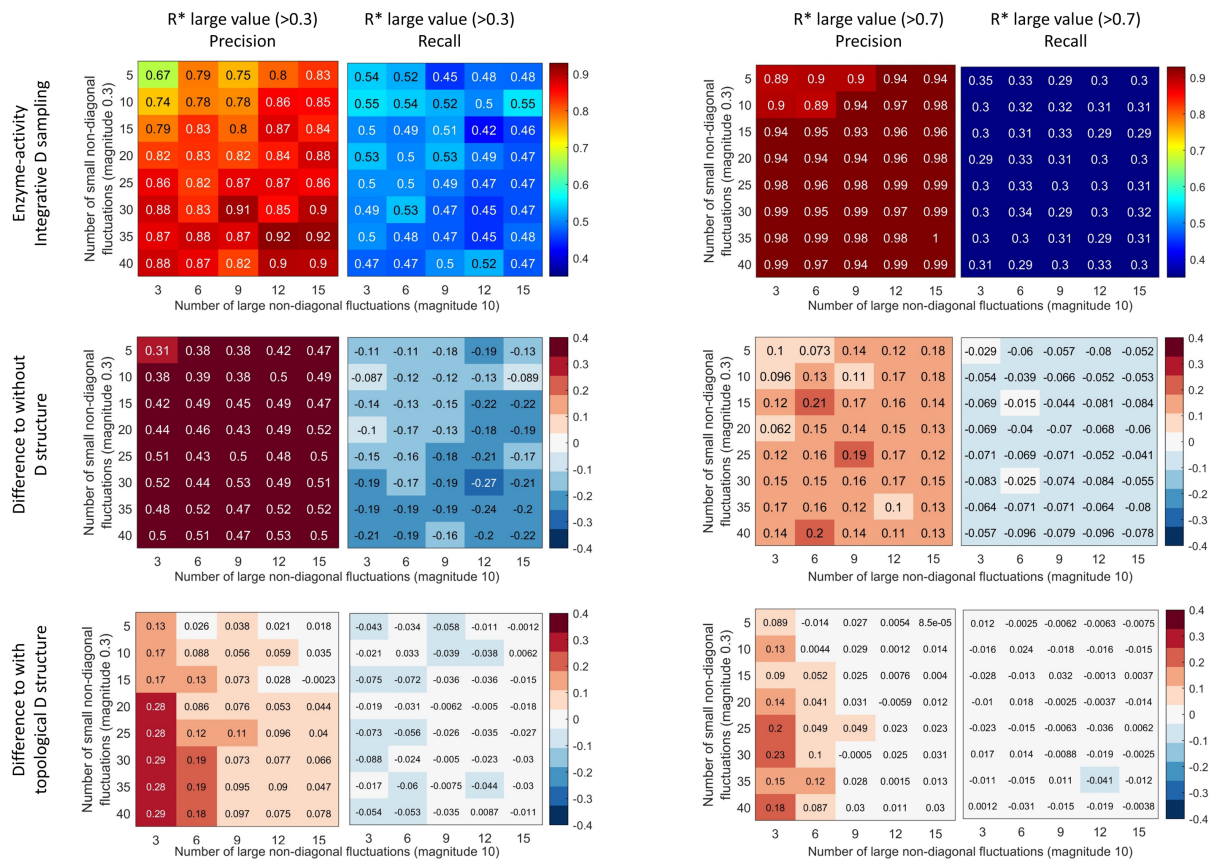

**Supplementary Figure 6. Precision and Recall of the large values in  $R^*$  based on different thresholds (left: 0.3, right: 0.7). Color code refers to Figure 6A.**

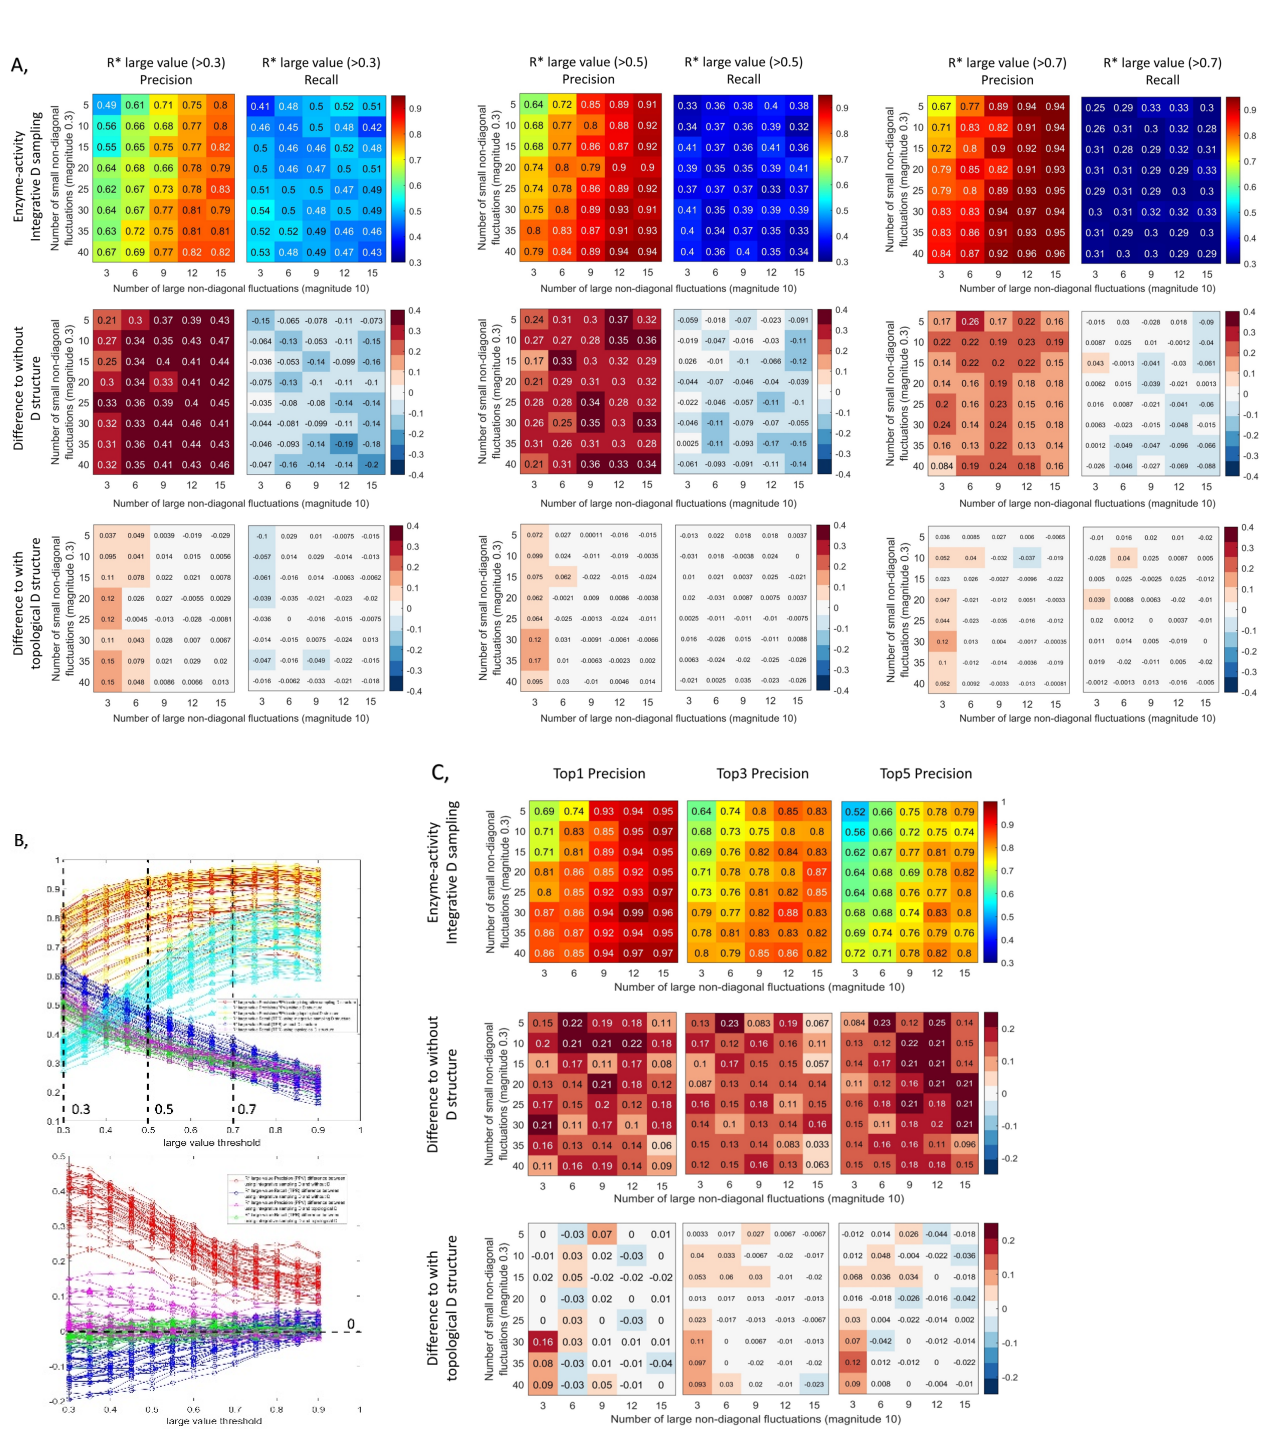

**Supplementary Figure 7. Inverse differential Jacobian algorithm evaluation using various number of large (magnitude: 10) and small (magnitude: 0.3) non-diagonal fluctuations using three strategies: integrative D sampling, topological D and without D structure. The evaluation is conducted using the first model in method section with 200 repeats and  $\varepsilon_D = 0.2$ . A, Precision and Recall of the large values (above 0.5) in  $R^*$  over 200 repeats with/without D structure information; B, the line plots of Precision and Recall of the large values in  $R^*$  with/without D structure information based on different large value**

thresholds (0.3-0.9), where the snapshot of value 0.5 refers to A; C, the accuracy of the top 1, top 3 and top 5 large values in  $\mathbf{R}^*$  over 200 repeats with/without D structure information.

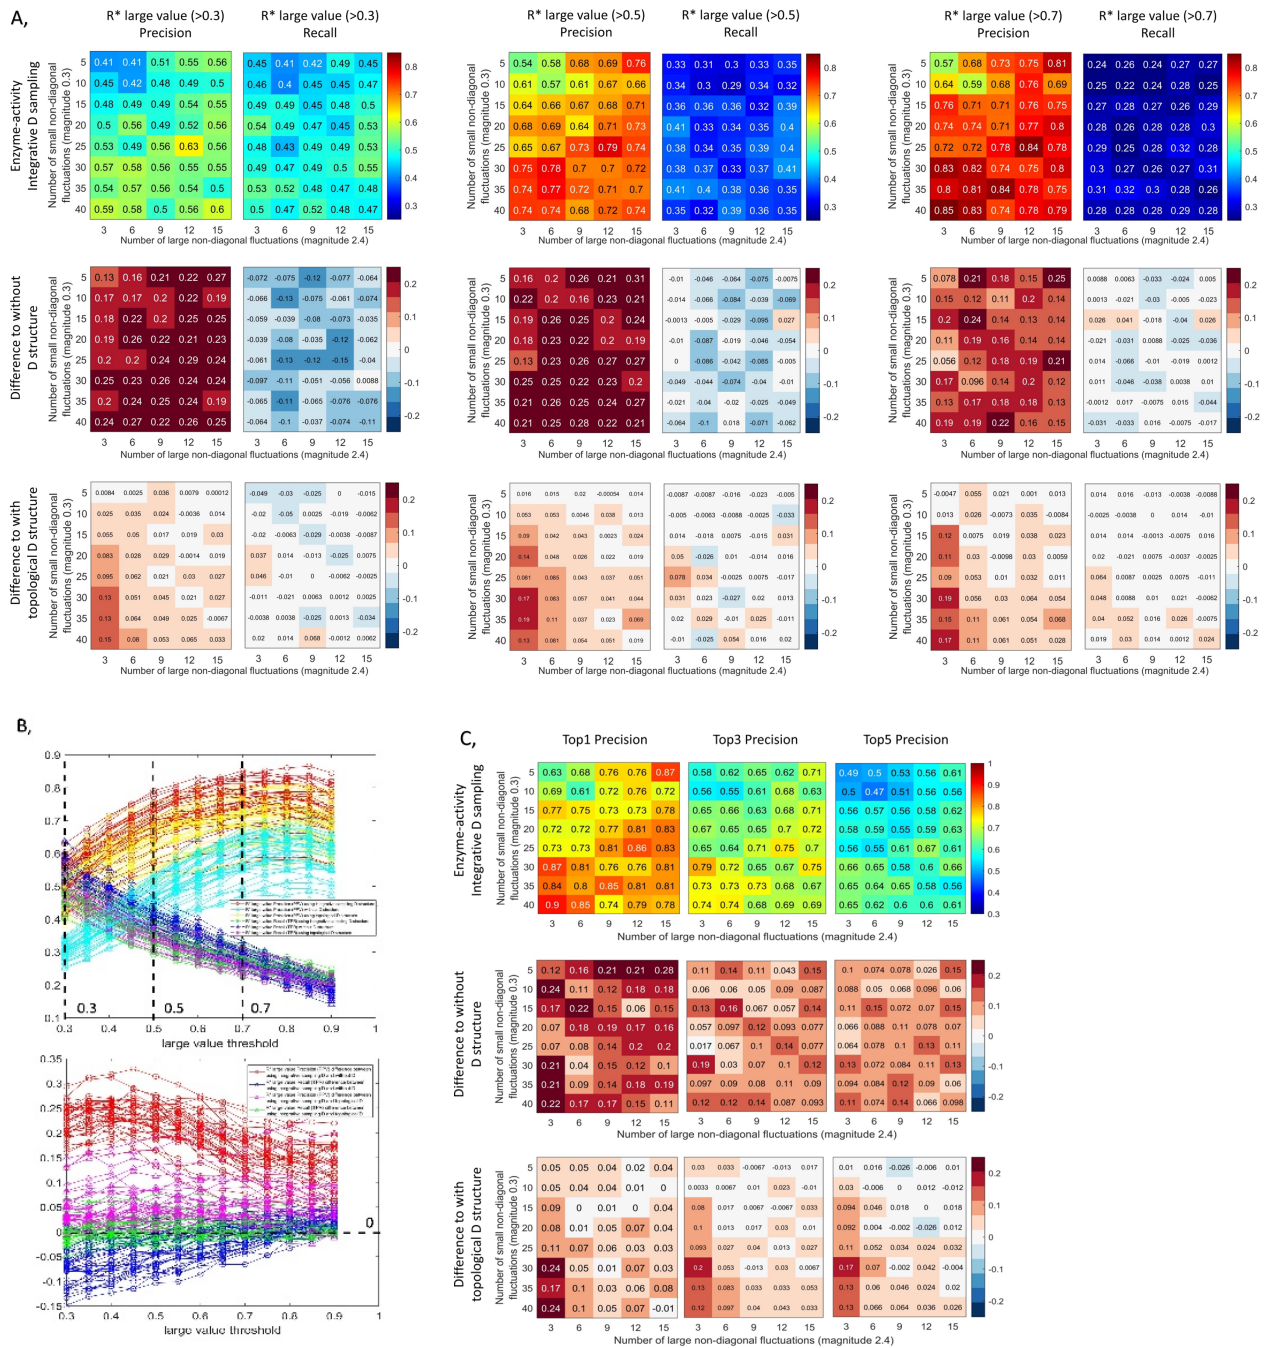

**Supplementary Figure 8. Inverse differential Jacobian algorithm evaluation using various number of large (magnitude: 2.4) and small (magnitude: 0.3) non-diagonal fluctuations using three strategies: integrative D sampling, topological D and without D structure. The evaluation is conducted using the first model in method section with 200 repeats and  $\varepsilon_D = 0.4$ . A, Precision and Recall of the large values (above 0.5) in  $R^*$  over 200 repeats with/without D structure information; B, the line plots of Precision and Recall of the large values in  $R^*$  with/without D structure information based on different large value**



thresholds (0.3-0.9), where the snapshot of value 0.5 refers to A; C, the accuracy of the top 1, top 3 and top 5 large values in  $\mathbf{R}^*$  over 200 repeats with/without D structure information.

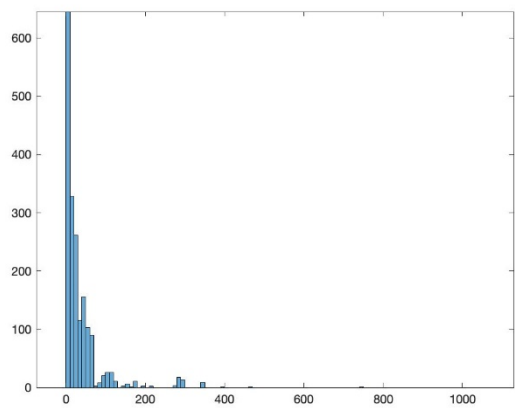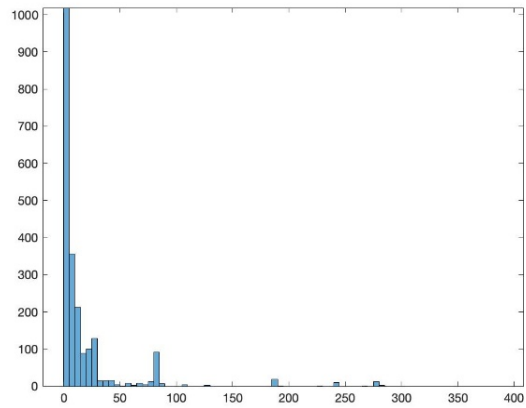

**Supplementary Figure 9. The histogram plots of the activities variances of the two cell lines enzymes.**

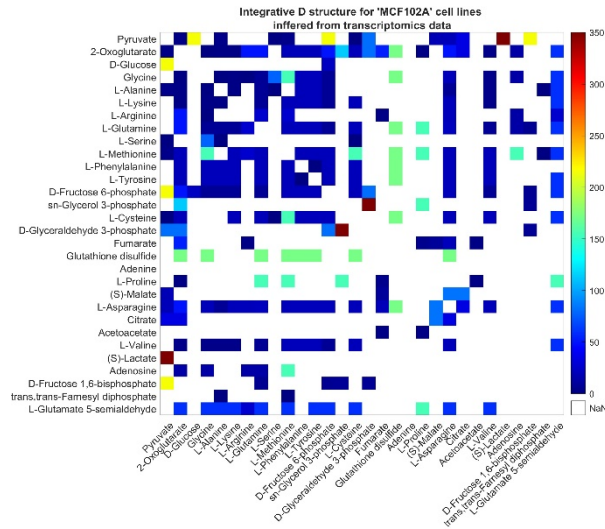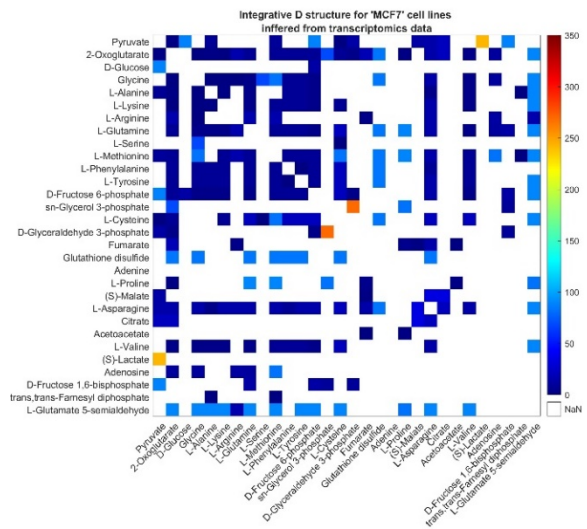

**Supplementary Figure 10. The inferred fluctuation matrix structure for the two different cell lines (left:  $D_h$  for MCF 102A and right:  $D_d$  for MCF 7).**

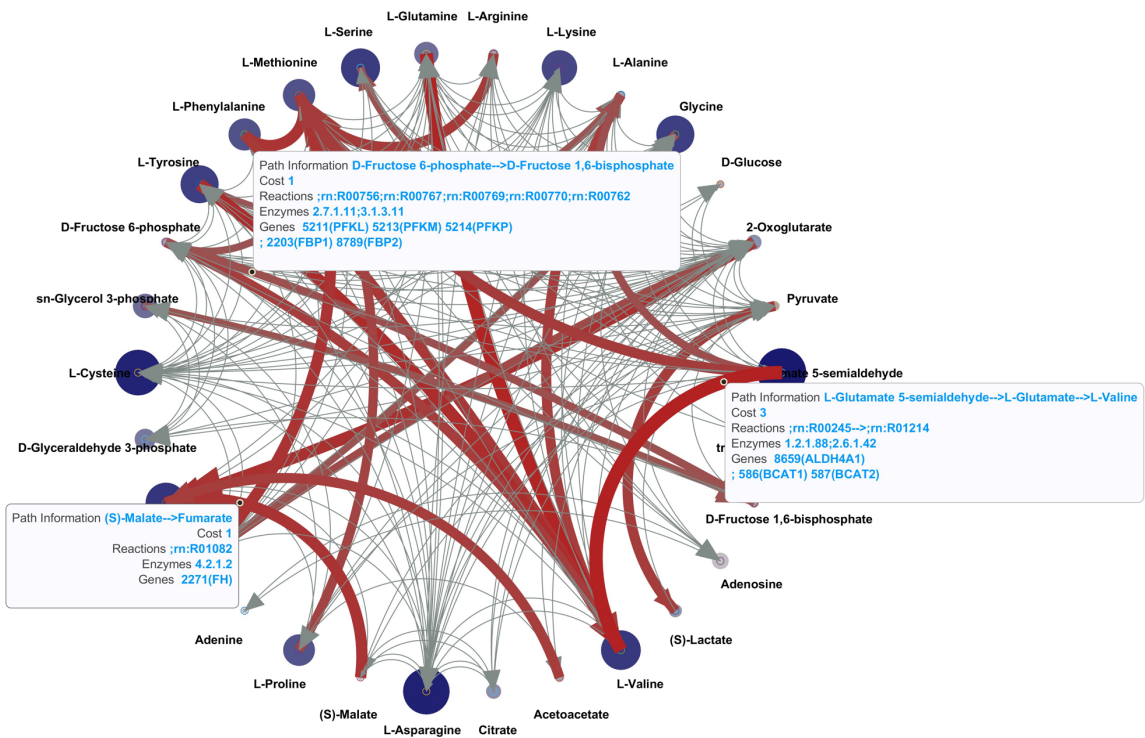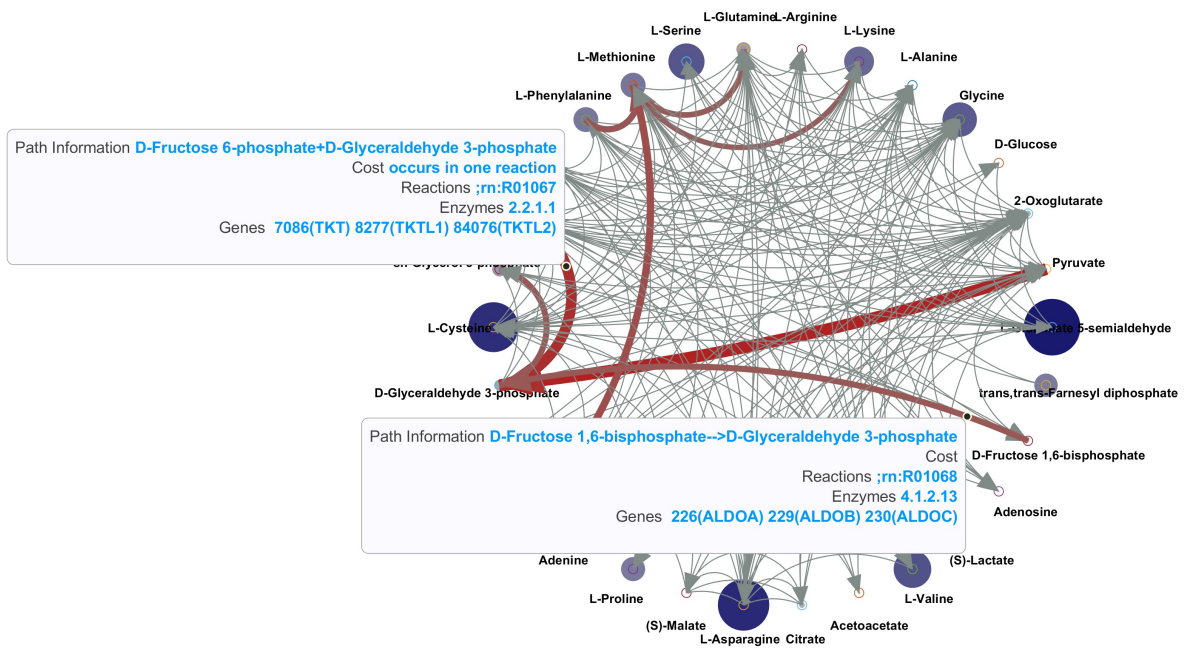



**Supplementary Figure 11. The interactive plots of breast cancer inverse Jacobian analysis.** Top plot uses a diagonal D assumption and bottom plot uses enzyme-activity integrative D sampling. The circular plot can be interactively checked by clicking the interactions (lines) through the matlab figure format result available in Supplementary material S2.

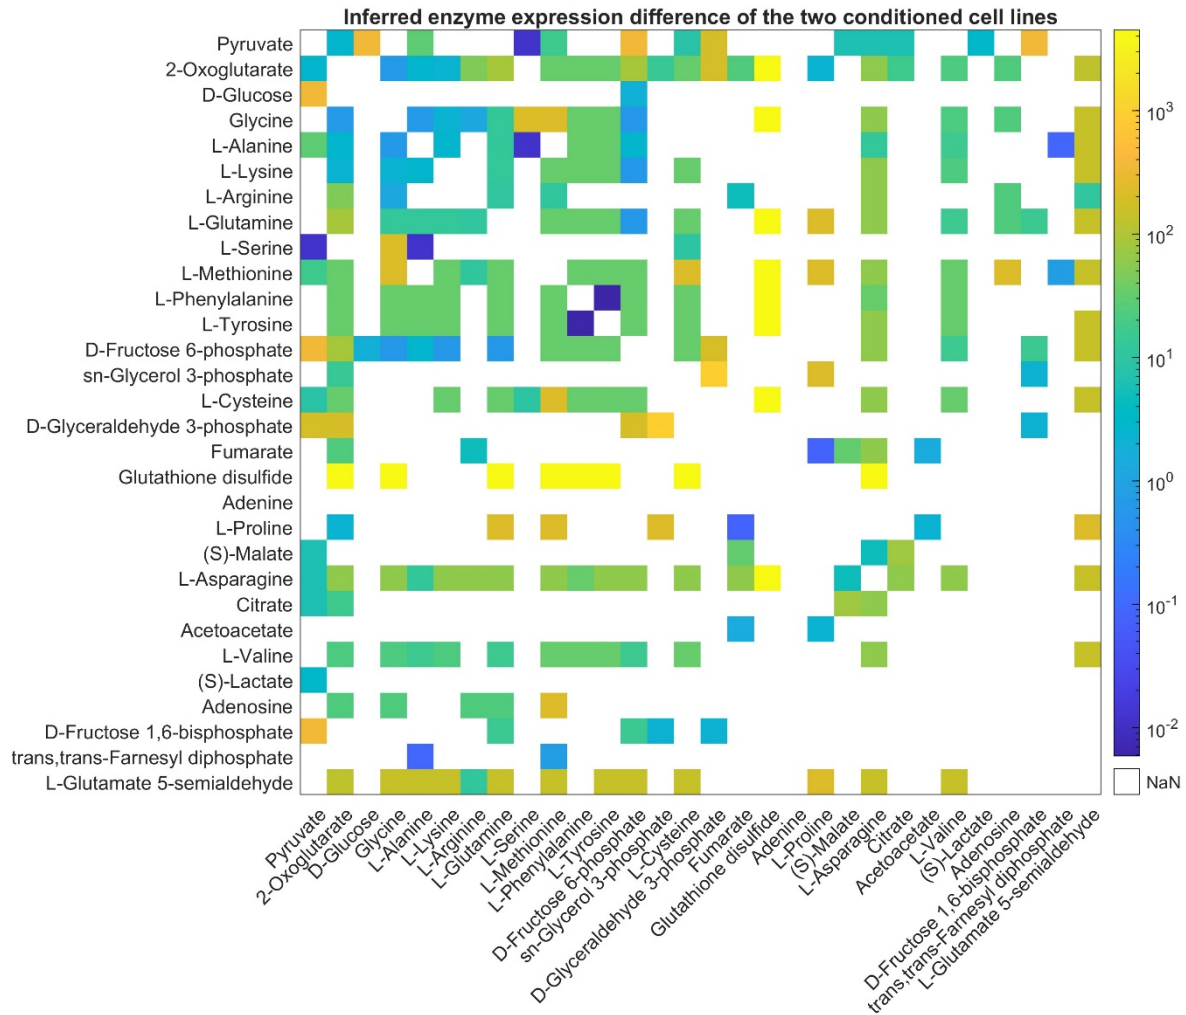

**Supplementary Figure 12. The inferred enzyme expression difference of the two conditioned cell lines.**
